# Supplementary material
Source: PubMed Central journal article supplement (PMC6352515)
Supplement: Supp_Fig1.pdf [file Supp_Fig1.pdf]

## Supplementary Data

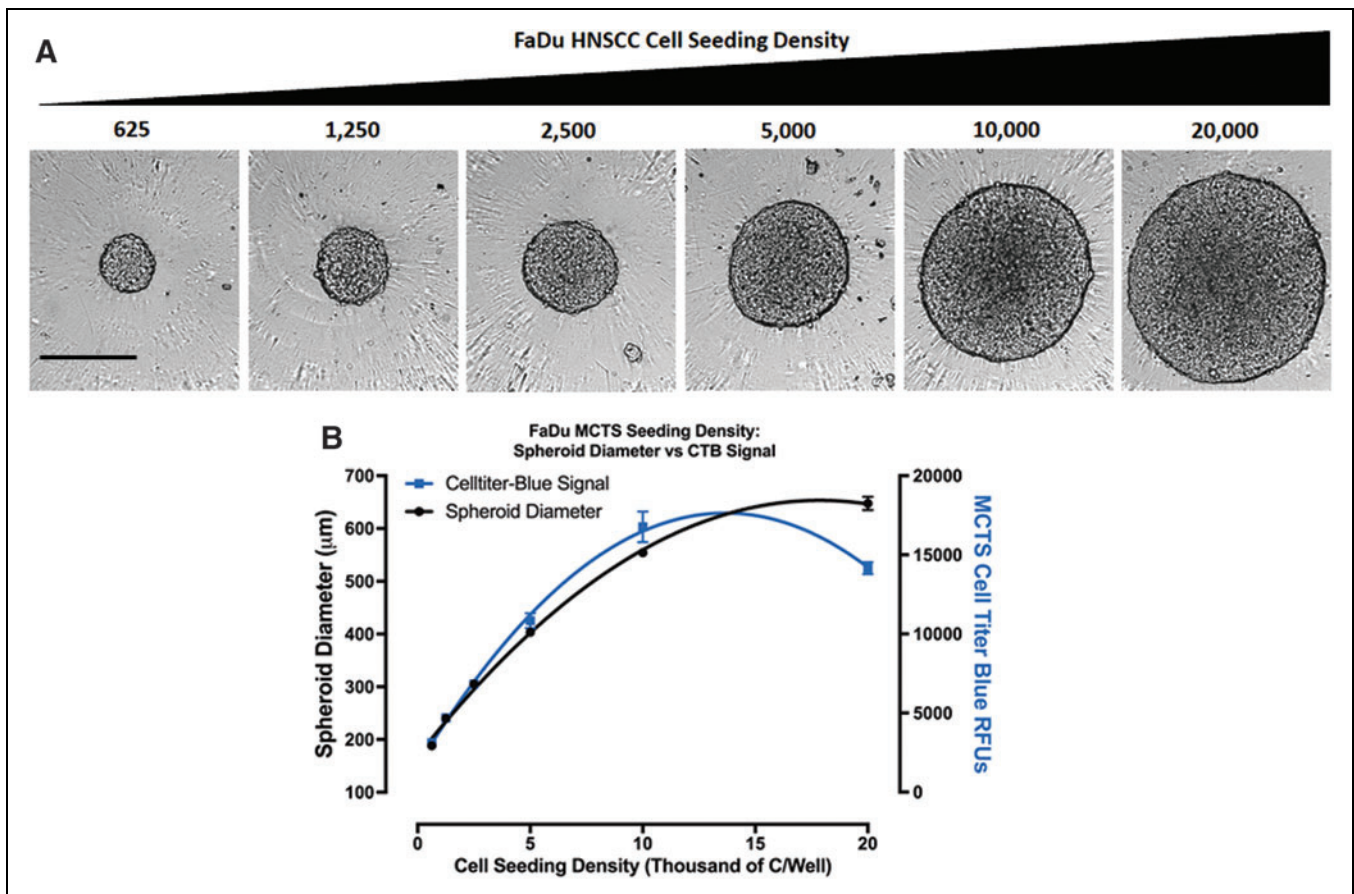

**Supplementary Fig. S1.** Correlation between FaDu cell seeding density MCTS diameter and CTB RFU Signals. **(A)** FaDu HNSCC cells were seeded at seeding densities ranging from 625 to 20,000 cells per well into 384-well ULA-plates, and after 24 h in culture  $4\times$ TL images of the MCTSs were acquired on the IXM. All scale bars represent 300  $\mu\text{m}$ . **(B)** We measured the diameters of the FaDu MCTSs in the TL images using the line-scan tool and measured the CTB RFUs 4 h after reagent addition. The mean  $\pm$  SD ( $n=3$ ) of the FaDu MCTS diameter measurements in  $\mu\text{m}$  (black circle) and CTB RFU signals (blue square) from three wells for each seeding density are presented. The MCTS diameter measurements in  $\mu\text{m}$  are plotted on the Y axis on the left, and the CTB RFUs are plotted on the Y axis on the right. Representative experimental data from multiple independent experiments are shown. CTB, CellTiter-Blue<sup>®</sup>; HNSCC, head and neck squamous cell carcinoma; IXM, ImageXpress Micro; MCTS, multicellular tumor spheroid; RFU, relative fluorescent unit; SD, standard deviation; TL, transmitted light; ULA-plates, ultra-low attachment microtiter plates.
